# Supplementary material
Source: HighWire-hosted journal article supplement (https://www.rcpjournals.org/highwire/filestream/13070/field_highwire_adjunct_files/0/Irvine_Supplementary_material_S1.pdf)
Supplement: Irvine_Supplementary_material_S1.pdf [file Irvine_Supplementary_material_S1.pdf]

**Table S1. Discrete event simulation model entities and assumptions**

| Area                      | Description                                                                                                                | Entry (deterministic)                                                                                                                                                             | Exit (deterministic)                                                                                                                   | Stochastic Activity (randomly selected from distribution described)                                                                  | Source of Parameter Data                                   | Assumptions                                                                                                                                                                                                                                                                                                |
|---------------------------|----------------------------------------------------------------------------------------------------------------------------|-----------------------------------------------------------------------------------------------------------------------------------------------------------------------------------|----------------------------------------------------------------------------------------------------------------------------------------|--------------------------------------------------------------------------------------------------------------------------------------|------------------------------------------------------------|------------------------------------------------------------------------------------------------------------------------------------------------------------------------------------------------------------------------------------------------------------------------------------------------------------|
| Community Assessment Hub  | Frontline community assessment<br>Triage and decision for hospitalisation                                                  | 60% of new cases via telephone triage <ul style="list-style-type: none"> <li>5.73% critically severe</li> <li>22.48% severe</li> <li>71.78% non-severe</li> </ul>                 | All critically severe & severe referred to ED<br>20% of non-severe referred to ED at random to reflect hospitalisation for other needs | Not explicitly modelled                                                                                                              | Mathematical spreadsheet model<br>Subject matter expertise | Patients with severe or critical/severe disease may attend either the hub or ED for clinical assessment.<br>All patients triaged to the hub with critical/severe disease will be suitable for hospitalisation.<br>Some patients with non-severe disease will require further assessment in secondary care. |
| Emergency Department (ED) | Community hub & self-presenting patients.<br>All cases enter hospital here.<br>All 3 acute sites modelled as single entity | 40% of new cases self-directed or via paramedic teams <ul style="list-style-type: none"> <li>5.73% critically severe</li> <li>22.48% severe</li> <li>71.78% non-severe</li> </ul> | All patients with severe & critically severe disease referred to AMU<br>20% of patients with non-severe disease referred to AMU        | Length of stay<br>Log-normal distribution: <ul style="list-style-type: none"> <li>Mean 2hrs</li> <li>Standards dev 30mins</li> </ul> | Mathematical spreadsheet model<br>Subject matter expertise | Some community hub referrals will be discharged from ED<br>All critically severe patients will be transferred to AMU (no impact on resource use or activity timing)<br>Four-hour standard of care for ED attendances is upheld<br>Unlimited capacity to see new arrivals in the ED                         |

|                                     |                                                                                                                                                                                                                                |                                                                                                                         |                                                                                                                                                                                                                                                                                               |                                                                                                                                                                                                                                                                                               |                                                                                                |                                                                                                                                                                                                      |
|-------------------------------------|--------------------------------------------------------------------------------------------------------------------------------------------------------------------------------------------------------------------------------|-------------------------------------------------------------------------------------------------------------------------|-----------------------------------------------------------------------------------------------------------------------------------------------------------------------------------------------------------------------------------------------------------------------------------------------|-----------------------------------------------------------------------------------------------------------------------------------------------------------------------------------------------------------------------------------------------------------------------------------------------|------------------------------------------------------------------------------------------------|------------------------------------------------------------------------------------------------------------------------------------------------------------------------------------------------------|
| Acute Medical Assessment Unit (AMU) | Urgent medical care beyond ED.<br>Containment to confirm COVID status<br>3 separate facilities modelled as one entity <ul style="list-style-type: none"> <li>• 64 COVID resources</li> <li>• 32 non-COVID resources</li> </ul> | All COVID patients enter through the ED<br>All non-COVID patients enter through ED or community via GP referral service | COVID <ul style="list-style-type: none"> <li>• 25% of severe/non-severe discharged home</li> </ul> Non-COVID <ul style="list-style-type: none"> <li>• 5% transferred to AMU COVID area</li> <li>• 75% transferred to non-COVID general ward bed</li> <li>• 20% discharged directly</li> </ul> | Length of Stay in AMU <ul style="list-style-type: none"> <li>• Normal distribution</li> <li>• Mean 36hrs</li> <li>• Standard dev 12hrs</li> </ul> Non-COVID activity<br>Poisson distribution<br>Rate 1.5                                                                                      | Local collected data of COVID and non-COVID activity<br>Subject matter expertise               | All patients remain in AMU until COVID results available (<48hrs)<br>Patients requiring critical care transferred immediately on leaving AMU<br>No capacity to see COVID patients in non-COVID areas |
| General Ward Beds                   | Level 0 and 1 Basic respiratory support<br>3 separate facilities in the region modelled as one entity <ul style="list-style-type: none"> <li>• 400 COVID resources</li> <li>• 651 non-COVID resources</li> </ul>               | Surviving patients stepped down from critical care.<br>Patients admitted from AMU                                       | <ul style="list-style-type: none"> <li>• 94% Discharge home</li> <li>• 6% Death</li> </ul>                                                                                                                                                                                                    | Length of stay <ul style="list-style-type: none"> <li>• Direct admissions</li> </ul> Log-normal distribution<br>Mean 219hrs<br>Standard dev 192hrs <ul style="list-style-type: none"> <li>• Step-down critical care</li> </ul> Weibull distribution<br>$\alpha$ 1.125 $\beta$ 169.6 Min 48hrs | International data <sup>7-11</sup><br><br>Locally available data<br>Subject matter expertise   | No delay to discharge once identified<br>Same length of stay for COVID and non-COVID patients                                                                                                        |
| Critical Care                       | Level 2 and 3 Advanced respiratory support                                                                                                                                                                                     | AMU only                                                                                                                | <ul style="list-style-type: none"> <li>• 50% Step down to general ward bed</li> <li>• 50% Death</li> </ul>                                                                                                                                                                                    | Length of stay <ul style="list-style-type: none"> <li>• Survivors Weibull</li> </ul> $\alpha$ 1.57 $\beta$ 130.13 Min 12hrs                                                                                                                                                                   | International data <sup>7-11</sup><br><br>ICNARC audit <sup>17</sup><br>Locally available data | Patients will have only one episode of critical care before death or step-down<br>Length of stay for survivors & non-survivors equivalent                                                            |

|  |                                                                                                                                                |  |  |                                                                                                                                                    |                          |                                            |
|--|------------------------------------------------------------------------------------------------------------------------------------------------|--|--|----------------------------------------------------------------------------------------------------------------------------------------------------|--------------------------|--------------------------------------------|
|  | 3 separate facilities modelled as one entity <ul style="list-style-type: none"> <li>• 80 COVID (incl. surge)</li> <li>• 7 non-COVID</li> </ul> |  |  | <ul style="list-style-type: none"> <li>• Non-survivors - Weibull<br/> <math>\alpha</math> 1.584 <math>\beta</math> 221.05<br/> Min 6hrs</li> </ul> | Subject matter expertise | Flexibility to increase non-COVID activity |
|--|------------------------------------------------------------------------------------------------------------------------------------------------|--|--|----------------------------------------------------------------------------------------------------------------------------------------------------|--------------------------|--------------------------------------------|
